# Supplementary material
Source: publisher site journal article supplement (https://www.spandidos-publications.com/6097/downloadSupplementary)

Figure S1. Expression of GLUT4 and CPT1 in H9c2 cardiomyocytes after transfection with either negative control or GLUT4 siRNA. Relative to transfection with negative control, GLUT4 expression was downregulated by 43.1% after transfection with GLUT4 siRNA at 50 nM for 48 h. Additionally, the expression of CPT1, the mitochondrial enzyme responsible for the translocation of fatty acids from the cytosol to the mitochondrial matrix, where fatty acid oxidation occurs, was upregulated by 11.6% after transfection with GLUT4 siRNA at 50 nM. A paired t-test was conducted to compare the protein expression in H9c2 cardiomyocytes after transfection with negative control with that after transfection with GLUT4 siRNA. GLUT4, glucose transporter type 4; CPT1, carnitine palmitoyltransferase 1; siRNA, small interfering RNA; CON, control; p-, phosphorylated.

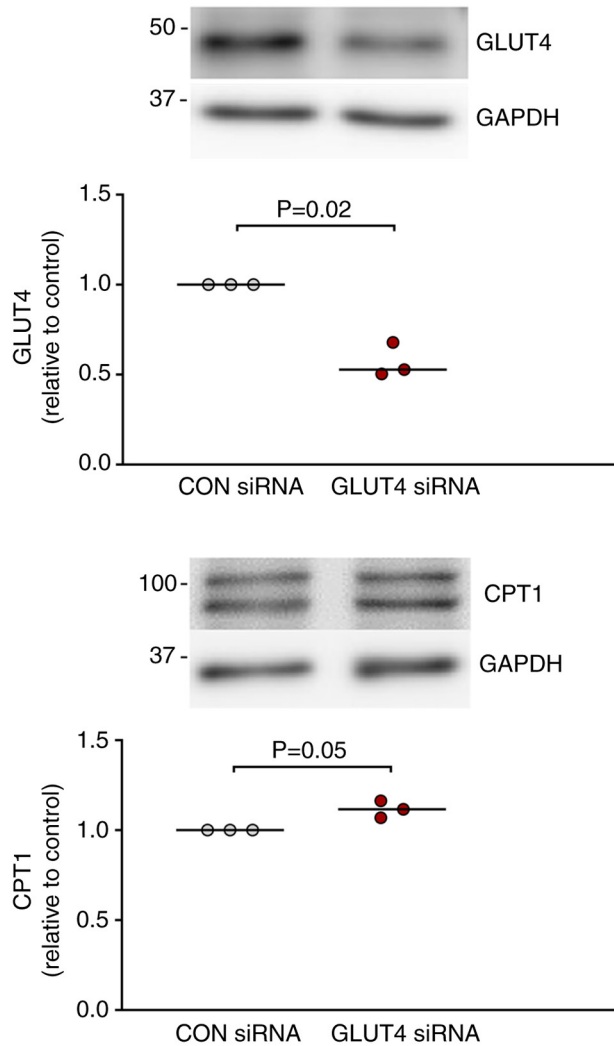

Figure S2. Expression of AMPK and calcineurin in H9c2 cardiomyocytes treated with LiCl. The expression of calcineurin and the total and p-forms of AMPK did not significantly differ between control cells (n=5) and H9c2 cardiomyocytes treated with 0.1 mM (n=5), 0.3 mM (n=5) and 1.0 mM (n=5) of LiCl. A one-way repeated measures analysis of variance was performed to compare protein expression under multiple treatment conditions. AMPK, adenosine monophosphate-activated protein kinase; CON, control; p-, phosphorylated.

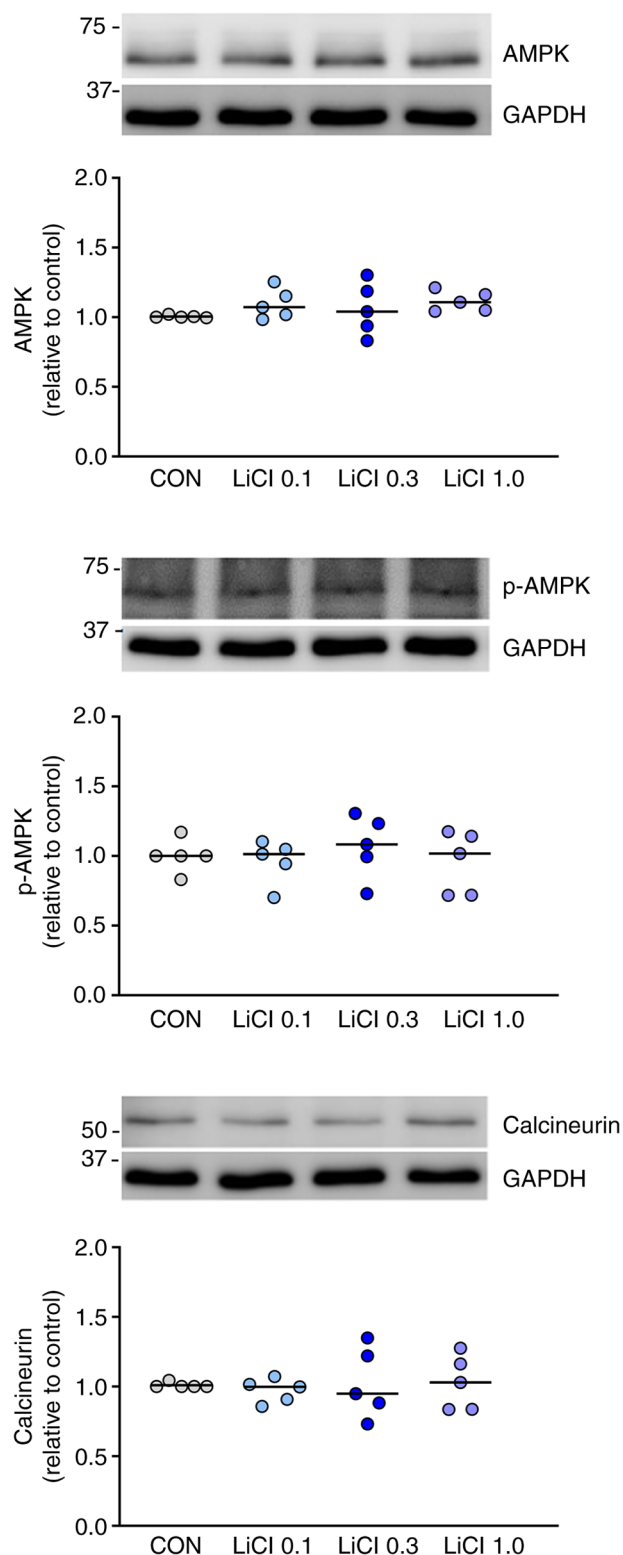

Supplement: Supplementary file 1 [file downloadSupplementary]
